# Supplementary material
Source: publisher figshare collection journal article supplement (https://acs.figshare.com/ndownloader/files/17916605)
Supplement: Supplementary file 1 [file 17916605]

## Sheet: DATA
Ibuprofen	BDDCS Class (Benet)	LTKBID (Chen)	Severity Class (Chen)	Label Section (Chen)	vDILIConcern (Chen)	Therapeutic Category or Mechanism of Action	TOTAL DAILY DOSE (mg)	Plasma Cmax total (uM)	Ionization by MOKA	Parent MW	ECCS Class	-p(MDD)	cLogP		THLE GMean_IC50 (uM)		HepG2 GMean_IC50 (uM)		HepG2_Glu GMean_IC50 (uM)		HepG2_Gal GMean_IC50 (uM)	HepG2 Glu/Gal Ratio		Mito Inhibition GMean_IC50 (uM)		Mito Uncoupler GMean_IC50 (uM)		MDR3 GMean_IC50 (uM)		MRP4 (Mean_% Inhibition at 300 uM)	dansylGSH assay (hit)		HEP3B GMean_IC50 (uM)		HEP3B:Compounds Plus BSO GMean_IC50 (uM)		HEP3B:Compounds plus BSO plus CYP2C9 GMean_IC50 (uM)		HEP3B:Compounds plus BSO plus CYP2D6 GMean_IC50 (uM)		HEP3B:Compounds plus BSO plus CYP3A4 GMean_IC50 (uM)	BSEP Vesicle SF9/Hi5 GMean_IC50 (uM)	Fsp3	Ro2 Score	Ro2 Hybrid HRM Score	Primary Assay Score	Partition Score	Partition Hybrid HRM Score
Amantadine	3	LT00503	3	Warnings and precautions	Ambiguous-DILI-concern	Dopaminergics	200	4.29752	Base	151.251	Class 2	-2.87867	1.995	>	300	>	175.959	>	300	>	300	1		NO EFFECT		NO EFFECT					NO	=	300	=	300	=	300	=	300	=	300	58.882	1	0	4	4	4	8
Ambrisentan	1	LT00618	7	Adverse reactions	Ambiguous-DILI-concern	ETRAs	10	3	Neutral	378.421	Class 4	-4.57798	3.751	>	300	>	300	>	300	>	300	1		NO EFFECT	=	69.19	>	300	=	88	NO	=	300	=	300	=	300	=	300	=	300	NE at 100	0.227	0	1	1	0	1
Buspirone	2	LT01148	3	Adverse reactions	Ambiguous-DILI-concern	Anxiolytics	60	0.005	Base	385.509	Class 2	-3.80788	2.185	>	300	>	275.387	>	300	>	258.603	1.2		NO EFFECT		NO EFFECT					NO	=	300	=	300	=	300	=	300	=	300	NE at 100	0.714	0	0	0	0	0
Carbidopa	1	LT01160	3	Warnings and precautions	Ambiguous-DILI-concern	Dopaminergics	200	0.68	Zwit	226.231	Class 3A	-3.05352	-0.445	>	293.136	>	249.199	>	300	>	300	1		NO EFFECT		NO EFFECT	=	250	=	21	YES	=	300	=	184.187	=	300	=	300	=	300	NE at 100	0.3	0	0	0	0	0
Clonidine	3	LT01231	3	Adverse reactions	Ambiguous-DILI-concern	Antiadrenergics	2.4	0.003	Base	230.097	Class 2	-4.9817	1.428	>	277.852	>	300	>	300	>	300	1		NO EFFECT		NO EFFECT					NO	=	300	=	300	=	300	=	300	=	300	NE at 100	0.222	0	0	0	0	0
Colchicine	1	LT00076	6	Adverse reactions	Ambiguous-DILI-concern	Antigout agents	2.4	0.014	Neutral	399.441	Class 4	-5.22124	1.195	<	0.293	<	0.293	>	300	>	300	1		NO EFFECT		NO EFFECT						=	300	=	300	=	300	=	300	=	300	NE at 100	0.364	0	2	2	0	2
Desipramine	1	LT01265	3	Adverse reactions	Ambiguous-DILI-concern	Antidepressants	300	0.06	Base	266.386	Class 2	-2.94839	4.468	=	158.584	=	45.726	=	106.445	=	131.215	0.8		NO EFFECT		NO EFFECT						=	126.878	=	94.477	=	139.863	=	132.241	=	131.845	NE at 100	0.333	4	4	0	4	4
Ethacrynic Acid Sodium		LT01344	5	Adverse reactions	Ambiguous-DILI-concern	Diuretics	200	0.33	Acid	303.14	Class 1A	-3.18061	3.445	=	4.855	=	4.641	=	34.527	=	19.151	1.8	>	25		NO EFFECT						=	19.926	=	8.68	=	12.111	=	3.219	=	2.325	85.855	0.231	4	7	3	4	7
Flurbiprofen	2	LT00298	3	Warnings and precautions	Ambiguous-DILI-concern	NSAIDs	300	57.316	Acid	244.264	Class 1A	-2.91074	3.754	>	300	>	300	>	300	>	300	1		NO EFFECT	>	100						=	300	=	300	=	300	=	300	=	300	NE at 100	0.133	4	7	3	4	7
Fluvoxamine	1	LT01396	3	Adverse reactions	Ambiguous-DILI-concern	Antidepressants	300	0.09375	Neutral	318.337	Class 2	-3.02577	3.321	=	60.709	=	31.652	=	97.455	=	92.501	1.1		NO EFFECT		NO EFFECT	=	4.6	=	64	YES											NE at 200	0.533	4	4	0	4	4
Furosemide	4	LT00299	2	Adverse reactions	Ambiguous-DILI-concern	Diuretics	600	3.265	Acid	330.747	Class 3A	-2.74134	1.9	>	285.235	>	300	>	300	>	300	1		NO EFFECT		NO EFFECT					NO	=	300	=	300	=	300	=	300	=	300	NE at 100	0.083	0	1	1	0	1
Ganciclovir Sodium	3	LT01406	7	Adverse reactions	Ambiguous-DILI-concern	Antivirals	3000	19.6	Neutral	255.233	Class 4	-1.92982	-2.545	>	300	>	300	>	300	>	300	1		NO EFFECT		NO EFFECT						=	300	=	300	=	300	=	300	=	300	NE at 100	0.444	0	0	0	0	0
Indinavir Sulfate	2	LT01446	8	Warnings and precautions	Ambiguous-DILI-concern	Antivirals	3200	11.73	Neutral	613.798	Class 4	-2.28288	3.681	>	300	>	300	>	300	>	300	1	>	25		NO EFFECT	=	266.1	=	57		=	300	=	300	=	300	=	300	=	300	28.372	0.472	4	10	6	4	10
Maprotiline	1	LT01503	5	Adverse reactions	Ambiguous-DILI-concern	Antidepressants	225	0.18	Base	277.409	Class 4	-3.09094	4.524	=	43.236	=	21.633	=	33.411	=	32.632	1		NO EFFECT		NO EFFECT						=	78.231	=	52.137	=	47.216	=	52.266	=	55.076	NE at 100	0.4	4	4	0	4	4
Oseltamivir Phosphate	1	LT02210	3	Adverse reactions	Ambiguous-DILI-concern	Antivirals	150	0.208	Neutral	312.407	Class 4	-3.31863	2.132	>	300	>	300	>	300	>	300	1		NO EFFECT		NO EFFECT						=	300	=	300	=	300	=	300	=	300	NE at 100	0.75	0	0	0	4	4
Propranolol Hydrochloride	1	LT01706	3	Warnings and precautions	Ambiguous-DILI-concern	Beta blockers	640	0.2	Base	259.347	Class 2	-2.6077	2.753	>	264.125	=	53.706	=	115.365	>	142.823	0.8		NO EFFECT		NO EFFECT					NO	=	253.37	=	253.43	=	452.53	=	2.1	=	53.73	NE at 100	0.375	0	0	0	4	4
Ribavirin	1	LT01730	7	Adverse reactions	Ambiguous-DILI-concern	Antivirals	1200	2.61	Neutral	244.207	Class 4	-2.30858	-2.849	=	253.321	=	278.274	>	300	>	300	1		NO EFFECT		NO EFFECT						=	300	=	300	=	300	=	300	=	300	NE at 100	0.625	0	1	1	0	1
Tolbutamide	2	LT00453	2	Adverse reactions	Ambiguous-DILI-concern	Antidiabetics	1500	295.915	Acid	270.351	Class 1A	-2.25584	2.497	>	300	>	300	>	300	>	300	1		NO EFFECT		NO EFFECT					NO	=	300	=	300	=	300	=	300	=	300	NE at 100	0.417	0	0	0	0	0
ADX-10059				Discontinued	Clinical Dev	mGluR5, negative allosteric modulator	200	0.44	Neutral	240.281	Class 2	-3.07969	4.047	=	57.462	=	27.481	=	25.585	=	21.071	1.2		NO EFFECT	>	100																25.094	0.133	4	6	2	4	6
CI-1034 (Fandosentan)				Discontinued	Clinical Dev	ETRAs	100	1.8	Acid	517.478	Class 3B	-3.71389	5.443	=	174.412	>	299.7	>	300	>	300	1	>	25	=	33.755																26.097	0.16	4	11	7	4	11
CP-085958				Discontinued	Clinical Dev	LTD4 antagonists	200	55	Neutral	465.499	Class 4	-3.36689	4.613	>	204.864	>	300	>	300	>	300	1	>	23.3414		NO EFFECT																14.223	0.2	4	15	11	4	15
CP-122721				Discontinued	Clinical Dev	Substance P	200	1.3	Base	380.41	Class 2	-3.27922	4.593	>	70.074	=	13.739	=	29.083	=	36.299	0.8	>	25	>	59.214																99.473	0.4	4	11	7	4	11
CP-422935				Discontinued	Clinical Dev	NPY-1 Antagonist	500	11.9	Neutral	378.56	Class 4	-2.87916	6.779	>	246.733	>	300	>	300	>	300	1		NO EFFECT		NO EFFECT																NE at 200	0.52	4	6	2	4	6
CP-456773				Discontinued	Clinical Dev	IL-1 Releasing Inhibitor	1200	100	Neutral	404.485	Class 4	-2.52772	3.382	>	300	>	300	>	300	>	300	1		NO EFFECT	>	100																NE at 100	0.45	4	7	3	4	7
CP-457920				Discontinued	Clinical Dev	GABAA5 Inverse Agonist	120	3.09	Neutral	323.35	Class 2	-3.43049	2.229	>	266.495	>	300	>	300	>	300	1		NO EFFECT		NO EFFECT																56.023	0.167	0	3	3	4	7
CP-724714				Discontinued	Clinical Dev	HER2 tyrosine kinase inhibitor	500	8.5	Neutral	469.545	Class 2	-2.97271	4.792	=	39.93	=	61.187	>	300	=	95.838	3.1	=	13.7985		NO EFFECT																10.047	0.185	4	18	14	4	18
Darbufelone				Discontinued	Clinical Dev	PGHS-2 inhibitor	30	3.97	Neutral	332.466	Class 4	-4.04463	3.742	=	52.17	=	59.929	=	124.606	=	73.516	1.7	>	25	>	96.788																29.081	0.444	0	10	10	4	14
Ezlopitant				Discontinued	Clinical Dev	Substance P	300	1	Base	454.658	Class 4	-3.18056	6.598	=	18.506	=	8.255	=	12.265	=	12.656	1		NO EFFECT	=	44.38																80.053	0.419	4	10	6	4	10
Flupirtine (Kv7 hepatotoxic@400)				Warnings and precautions	Most-DILI-Concern	Kv7 channel opener	400	2.6	Neutral	304.323	Class 2	-2.88127	3.053	>	277.7	>	300	>	300	>	300	1		13.8		NO EFFECT					YES											NE at 100	0.2	4	7	3	4	7
Flupirtine (Kv7 hepatotoxic@600)				Warnings and precautions	Most-DILI-Concern	Kv7 channel opener	600	4.1	Neutral	304.323	Class 2	-2.70518	3.053	>	277.7	>	300	>	300	>	300	1		13.8		NO EFFECT					YES											NE at 100	0.2	4	8	4	4	8
Ingliforib				Discontinued	Clinical Dev	glycogen phosphorylase inhibitor	1800	48.9	Neutral	457.912	Class 4	-3.25	3.104	=	175.133	=	155.578	>	235.203	=	216.189	1.1		NO EFFECT		NO EFFECT																54.358	0.304	4	10	6	4	10
LY2409021 (30 mg)				Discontinued	Clinical Dev	GCGRA	30	8.24	Neutral	555.637	Class 4	-4.26767	7.402	=	12.531	=	32.427	=	75.908	=	96.429	0.8	>	25	=	41.01																41.87	0.375	0	12	12	0	12
LY2409021 (5 mg)				Discontinued	Clinical Dev	GCGRA	5	1.46	Neutral	555.637	Class 4	-5.04582	7.402	=	12.531	=	32.427	=	75.908	=	96.429	0.8	>	25	=	41.01																41.87	0.375	0	9	9	0	9
LY2409021 (60 mg)*				Discontinued	Clinical Dev	GCGRA	60	20.5	Neutral	555.637	Class 4	-3.96664	7.402	=	12.531	=	32.427	=	75.908	=	96.429	0.8	>	25	=	41.01																41.87	0.375	0	13	13	4	17
LY2409021 (90 mg)*				Discontinued	Clinical Dev	GCGRA	90	25.6	Neutral	555.637	Class 4	-3.79055	7.402	=	12.531	=	32.427	=	75.908	=	96.429	0.8	>	25	=	41.01																41.87	0.375	0	14	14	4	18
MK-0893 (120 mg)*				Discontinued	Clinical Dev	GCGRA	120	3	Neutral	588.491	Class 4	-3.69056	7.84	=	35.939	=	89.451	>	191.49	=	141.397	1.4	>	22.6713	=	65.61																36.444	0.156	4	14	10	4	14
MK-0893 (40 mg)				Discontinued	Clinical Dev	GCGRA	40	1	Neutral	588.491	Class 4	-4.16768	7.84	=	35.939	=	89.451	>	191.49	=	141.397	1.4	>	22.6713	=	65.61																36.444	0.156	0	7	7	0	7
Nitecapone				Discontinued	Clinical Dev	Dopaminergics	100	6	Neutral	265.221	Class 4	-3.42361	1.029	=	22.988	=	44.872	>	252.565	=	149.862	1.7		NO EFFECT		NO EFFECT																NE at 100	0.167	0	3	3	4	7
PF-00194223				Discontinued	Clinical Dev	PPARs	60	5	Acid	469.534	Class 1B	-3.89352	5.867	=	83.638	>	228.498	>	276.7	>	166.574	1.7	=	10.5953	>	89.508					NO											8.722	0.241	0	10	10	4	14
PF-04287881				Discontinued	Clinical Dev	Antibacterials	1100	3.4	Neutral	825.995	Class 4	-2.87558	4.016	>	128.42	=	23.97	>	59.837	>	166.249	0.4		NO EFFECT		NO EFFECT																51.153	0.721	4	9	5	4	9
PF-04895162 (Kv7)				Discontinued	Clinical Dev	Kv7 channel opener	600	28.9	Neutral	355.344	Class 2	-2.7725	2.733	=	192.408	=	129.517	>	300	=	285.439	1.1	=	10.275	>	100																66.033	0.211	0	13	13	4	17
PF-05020182 (Kv7-Better)				Discontinued	Clinical Dev	Kv7 channel opener	600	28.9	Neutral	366.462	Class 2	-2.78588	2.196	>	300	>	300	>	300	>	300	1		NO EFFECT	=	3.79																39.671	0.722	0	7	7	4	11
PF-05180999				Discontinued	Clinical Dev	PDE2	420	1.05	Neutral	414.395	Class 2	-2.99417	1.56	>	300	>	300	>	300	>	300	1		NO EFFECT		NO EFFECT																NE at 200	0.316	0	0	0	4	4
PF-06273340				Discontinued	Clinical Dev	Pan-TRK	600	1.69	Neutral	479.928	Class 2	-2.90302	0.952	>	42	>	239	>	300	>	300	1																				3	0.217	0	5	5	4	9
PF-06291874 (15 mg)				Discontinued	Clinical Dev	GCGRA	15	1.4	Neutral	503.513	Class 2	-4.52592	6.083	=	87.462	>	228.045	>	295.525	>	215.511	1.4	>	6.58886	>	73.007																36.643	0.346	0	8	8	0	8
PF-06291874 (150 mg)*				Discontinued	Clinical Dev	GCGRA	150	16.4	Neutral	503.513	Class 2	-3.52592	6.083	=	87.462	>	228.045	>	295.525	>	215.511	1.4	>	6.58886	>	73.007																36.643	0.346	4	18	14	4	18
PF-06291874 (35 mg)				Discontinued	Clinical Dev	GCGRA	30	3.6	Neutral	503.513	Class 2	-4.22489	6.083	=	87.462	>	228.045	>	295.525	>	215.511	1.4	>	6.58886	>	73.007																36.643	0.346	0	11	11	0	11
PF-06291874 (75 mg)*				Discontinued	Clinical Dev	GCGRA	100	7.1	Neutral	503.513	Class 2	-3.70201	6.083	=	87.462	>	228.045	>	295.525	>	215.511	1.4	>	6.58886	>	73.007																36.643	0.346	4	16	12	4	16
PF-06545834 (Kv7-Worse)				Discontinued	Clinical Dev	Kv7 channel opener	600	28.9	Neutral	409.358	Class 2	-2.83395	4.871	=	22.369	=	11.019	>	300	=	20.995	14.3	=	19.35	=	24.9																7.659	0.3	4	24	20	4	24
PF-06547136 (Kv7-Best)				Discontinued	Clinical Dev	Kv7 channel opener	600	28.9	Neutral	380.292	Class 2	-2.80197	2.485	>	300	>	300	>	300	>	300	1		NO EFFECT		NO EFFECT																NE at 100	0.533	0	0	0	4	4
Pranlukast				Approved in Japan	Less-DILI-Concern	LTD4 antagonists	450	1.23	Neutral	481.503	Class 4	-3.02939	5.075	=	153.8	=	182.5	=	221.7	=	238.2	0.9	>	25		NO EFFECT																2.055	0.148	4	9	5	4	9
Solithromycin				Withdrawn from registration	Clinical Dev	Antibacterials	400	2.6	Neutral	845.009	Class 4	-3.3248	3.693	=	172.314	=	126.38	=	127.134	=	109.211	1.2		NO EFFECT		NO EFFECT					NO											16.296	0.721	4	9	5	4	9
T62				Discontinued	Clinical Dev	Adenosine A1R antagonist	400	0.6	Neutral	291.801	Class 4	-2.86303	5.241	=	85.335	=	129.18	=	188.867	=	166.263	1.1	>	13.1041		NO EFFECT																16.286	0.267	4	8	4	4	8
TAK-875 (Fasiglifam)				Discontinued	Clinical Dev	GPR40 agonist	50	10.1	Neutral	524.625	Class 2	-4.02088	4.697	=	138.818	=	276.763	>	300	>	271.557	1.1	=	11.7947		NO EFFECT																14.217	0.345	0	8	8	4	12
Verlukast				Discontinued	Clinical Dev	LTD4 antagonists	500	38.8	Neutral	515.087	Class 2	-3.01291	5.65	=	84.043	=	296.75	>	300	>	300	1	>	25		NO EFFECT																3.384	0.269	4	15	11	4	15
Zamifenacin				Discontinued	Clinical Dev	M3 Antagonist	40	4.1	Neutral	415.53	Class 4	-4.01654	5.965	=	159.743	=	97.981	>	264.429	>	229.276	1.2	>	25	>	95.158																45.97	0.333	0	9	9	4	13
Acetylsalicylic Acid (Aspirin)	1	LT00053	0	No match	Less-DILI-Concern	NSAIDs	3900	133	Acid	180.158	Class 1A	-1.66459	1.023	>	300	>	300	>	300	>	300	1		NO EFFECT		NO EFFECT	>	300	=	9	NO	=	300	=	300	=	300	=	300	=	300	NE at 200	0.111	0	0	0	0	0
Acyclovir	4	LT00041	5	Adverse reactions	Less-DILI-Concern	Antivirals	4000	6.7	Neutral	225.207	Class 4	-1.75052	-2.422	>	300	>	300	>	300	>	300	1	>	25		NO EFFECT						=	300	=	300	=	300	=	300	=	300	NE at 100	0.375	0	3	3	0	3
Alendronate Sodium	3	LT00980	0	No match	Less-DILI-Concern	Antihypocalcemic agents	10	0.022	Neutral	249.095	Class 4	-4.39637	-5.642	>	300	>	300	>	300	>	300	1		NO EFFECT		NO EFFECT	>	300	=	25	NO	=	300	=	300	=	300	=	300	=	300	NE at 200	1	0	0	0	0	0
Amoxicillin	3	LT00507	5	Adverse reactions	Less-DILI-Concern	Antibacterials	2000	17.789	Neutral	364.4	Class 4	-2.26055	-2.418	>	300	>	300	>	300	>	300	1		NO EFFECT		NO EFFECT						=	300	=	300	=	300	=	300	=	300	NE at 100	0.438	0	0	0	0	0
Bupropion	1	LT00058	5	Adverse reactions	Less-DILI-Concern	Antidepressants	450	0.584	Base	239.744	Class 2	-2.72654	3.211	>	300	>	300	>	300	>	300	1		NO EFFECT	>	100					NO	=	300	=	300	=	300	=	300	=	300	NE at 100	0.462	4	4	0	4	4
Candesartan	4	LT01022	3	Adverse reactions	Less-DILI-Concern	A2RA	32	0.78	Neutral	440.461	Class 4	-4.13876	5.191	>	300	>	300	>	300	>	300	1		NO EFFECT		NO EFFECT					NO											81.019	0.125	0	0	0	0	0
Captopril	3	LT00059	7	Adverse reactions	Less-DILI-Concern	ACE inhibitors	450	4.28	Neutral	217.287	Class 4	-2.68382	0.89	>	300	>	300	>	300	>	300	1		NO EFFECT		NO EFFECT						=	300	=	300	=	300	=	300	=	300	NE at 100	0.778	0	0	0	0	0
Carboplatin	3	LT00061	3	Warnings and precautions	Less-DILI-Concern	Antineoplastic agents	648	105	Acid	144.125	Class 1A	-2.34716	0.101	>	300	>	300	>	300	>	300	1		NO EFFECT		NO EFFECT						=	300	=	300	=	300	=	300	=	300	NE at 100	0.667	0	0	0	0	0
Chloroquine	3	LT01207	3	Adverse reactions	Less-DILI-Concern	Antiprotozoals	600	1.42	Neutral	319.877	Class 2	-2.72683	5.06	>	175.729	=	32.257	>	130.46	>	163.325	0.8		NO EFFECT		NO EFFECT						=	300	=	300	=	300	=	300	=	300	NE at 100	0.5	4	6	2	4	6
Chlorpromazine	1	LT00068	2	Adverse reactions	Less-DILI-Concern	Antipsychotics	800	0.94	Base	318.87	Class 2	-2.60052	5.3	=	31.741	=	16.482	=	30.261	=	31.963	0.9		NO EFFECT	=	80.724					NO	=	15.733	=	13.127	=	23.965	=	19.267	=	15.093	NE at 100	0.294	4	7	3	4	7
Chlorpropamide	0	LT00379	2	Adverse reactions	Less-DILI-Concern	Antidiabetics	375	122.859	Acid	276.743	Class 1A	-2.86805	2.35	>	300	>	300	>	300	>	300	1		NO EFFECT		NO EFFECT						=	300	=	300	=	300	=	300	=	300	NE at 100	0.3	4	4	0	0	0
Cisplatin	1	LT00071	3	Warnings and precautions	Less-DILI-Concern	Antineoplastic agents	180	6.5	Neutral	227.126		-3.10099	-1.684	>	300	>	300	>	300	>	300	1		NO EFFECT	=	99.39						=	300	=	124.027	=	45.707	=	66.576	=	37.24	NE at 100	0	0	2	2	4	6
Clofibrate	2	LT00011	3	Warnings and precautions	Less-DILI-Concern	Antihyperlipidemics	2000	98.888	Neutral	242.7	Class 2	-2.08404	3.679	>	300	>	204.174	>	300	>	292.838	1		NO EFFECT		NO EFFECT						=	300	=	300	=	300	=	300	=	300	NE at 100	0.417	4	7	3	4	7
Clotrimazole	2	LT00248	3	Warnings and precautions	Less-DILI-Concern	Antifungals	100	0.087	Neutral	344.843	Class 4	-3.53762	5.004	=	42.018	=	58.691	=	103.481	=	76.542	1.4	=	10.7575		NO EFFECT					NO	=	42.776	=	39.294	=	36.763	=	44.435	=	40.539	14.546	0.045	4	4	0	4	4
Cyclophosphamide	1	LT00013	5	Adverse reactions	Less-DILI-Concern	Antineoplastic agents	600	264.281	Neutral	261.088	Class 2	-2.63864	0.803	>	300	>	300	>	300	>	300	1		NO EFFECT		NO EFFECT						=	300	=	300	=	300	=	300	=	300	NE at 100	1	0	0	0	0	0
Deferoxamine		LT00386	0	No match	Less-DILI-Concern	Chelating agents	6000	17.835	Zwit	560.688	Class 3B	-1.97057	-0.184	=	80.554	=	14.333	>	300	>	300	1		NO EFFECT		NO EFFECT	>	300	=	3	NO	=	300	=	300	=	300	=	300	=	300	NE at 100	0.8	0	4	4	0	4
Entacapone	2	LT01968	0	No match	Less-DILI-Concern	Dopaminergics	1600	3.93	Neutral	305.29	Class 2	-2.28059	1.761	=	88.548	=	103.769	>	300	=	216.054	1.4		NO EFFECT	=	56.47					NO											52.615	0.286	0	6	6	4	10
Estradiol	1	LT00016	2	Adverse reactions	Less-DILI-Concern	Sex hormone modulators	6	0.000157721	Neutral	272.386	Class 2	-4.65703	3.784	=	103.886	=	90.128	>	300	>	300	1		NO EFFECT		NO EFFECT					YES	=	300	=	300	=	300	=	300	=	300	65.45	0.667	0	0	0	0	0
Fenofibrate	2	LT00098	3	Warnings and precautions	Less-DILI-Concern	Antihyperlipidemics	200	12.139	Neutral	360.835	Class 4	-3.25628	5.233	=	103.67	>	295.822	>	300	>	274.751	1.1		NO EFFECT	=	61.074						=	92.336	=	106.588	=	139.94	=	193.992	=	36.765	35.482	0.3	4	13	9	4	13
Fluoxetine	1	LT00018	3	Adverse reactions	Less-DILI-Concern	Antidepressants	80	0.1	Base	309.329	Class 2	-3.58733	4.566	=	73.568	=	11.39	=	19.36	=	19.864	1		NO EFFECT	>	100					YES	=	51.939	=	45.595	=	70.05	=	80.408	=	67.96	NE at 100	0.294	0	0	0	0	0
Glimepiride	2	LT00173	7	Adverse reactions	Less-DILI-Concern	Antidiabetics	8	1.12	Neutral	490.622	Class 2	-4.78766	3.962	>	294.328	>	300	>	300	>	300	1		NO EFFECT		NO EFFECT						=	300	=	300	=	300	=	103.471	=	46.006	16.374	0.542	0	2	2	0	2
Haloperidol	2	LT00405	5	Adverse reactions	Less-DILI-Concern	Antipsychotics	30	0.02	Base	375.869	Class 2	-4.09792	3.849	>	247.65	=	40.11	>	145.905	>	166.044	0.9		NO EFFECT		NO EFFECT					YES	=	300	=	300	=	300	=	300	=	300	NE at 100	0.381	0	0	0	0	0
Ibuprofen	2	LT00199	3	Warnings and precautions	Less-DILI-Concern	NSAIDs	3200	148.341	Neutral	206.285	Class 2	-1.80932	3.679	>	300	>	300	>	300	>	300	1		NO EFFECT		NO EFFECT						=	300	=	300	=	300	=	300	=	300	NE at 100	0.462	4	4	0	4	4
Ifosfamide	1	LT00562	4	Adverse reactions	Less-DILI-Concern	Antineoplastic agents	2160	202.998	Neutral	261.088	Class 2	-2.08233	0.923	>	300	>	300	>	300	=	121.643	2.5		NO EFFECT		NO EFFECT						=	300	=	300	=	300	=	300	=	300	NE at 100	1	0	2	2	0	2
Imipramine	1	LT00108	3	Adverse reactions	Less-DILI-Concern	Antidepressants	300	0.09	Base	280.413	Class 2	-2.97068	5.037	>	150.095	>	68.242	=	118.109	=	130.304	0.9		NO EFFECT	>	94.266						=	29.51	=	15.848	=	51.119	=	21.282	=	74.448	NE at 100	0.368	4	4	0	4	4
Ketorolac	3	LT00204	3	Warnings and precautions	Less-DILI-Concern	NSAIDs	40	3.53	Acid	255.269	Class 1A	-3.80494	1.622	>	298.884	>	158.3	=	97.635	>	138.064	0.7		NO EFFECT		NO EFFECT						=	300	=	13.839	=	39.031	=	17.572	=	22.312	NE at 100	0.2	0	1	1	0	1
Lamivudine	3	LT00569	3	Warnings and precautions	Less-DILI-Concern	Antivirals	300	5.19	Neutral	229.259	Class 4	-2.88321	-1.462	>	300	>	300	>	300	>	300	1		NO EFFECT		NO EFFECT	>	300	=	3	NO	=	300	=	300	=	300	=	300	=	300	NE at 100	0.5	0	0	0	0	0
Losartan	2	LT01499	4	Adverse reactions	Less-DILI-Concern	A2RA	200	1.02	Neutral	422.918	Class 4	-3.32523	3.852	>	300	>	300	>	300	>	300	1		NO EFFECT		NO EFFECT																2.804	0.273	4	7	3	4	7
Metoprolol	1	LT00309	5	Adverse reactions	Less-DILI-Concern	Beta blockers	200	0.98	Base	267.366	Class 2	-3.12608	1.486	>	300	>	300	>	300	>	300	1		NO EFFECT		NO EFFECT					NO	=	300	=	300	=	300	=	300	=	300	NE at 100	0.6	0	0	0	4	4
Metronidazole	1	LT00584	3	No match	Less-DILI-Concern	Antibacterials	4000	237.213	Neutral	171.155	Class 2	-1.63133	-0.457	>	300	>	300	>	300	>	300	1		NO EFFECT		NO EFFECT	>	300	=	3	NO	=	300	=	300	=	300	=	300	=	300	NE at 100	0.5	0	0	0	0	0
Montelukast	2	LT02007	3	Adverse reactions	Less-DILI-Concern	LTD4 antagonists	10	0.648	Neutral	586.192	Class 4	-4.76804	8.472	=	38.967	=	36.834	=	57.944	=	39.295	1.5	>	25	>	100					YES	=	30.653	=	36.095	=	49.651	=	79.205	=	29.563	4.444	0.314	0	6	6	0	6
Naproxen	2	LT00593	3	Warnings and precautions	Less-DILI-Concern	NSAIDs	1000	338.315	Acid	230.259	Class 1A	-2.36222	2.816	>	300	>	300	>	300	>	300	1		NO EFFECT		NO EFFECT					NO	=	300	=	300	=	300	=	300	=	300	NE at 100	0.214	0	0	0	4	4
Nifedipine	2	LT00313	3	Warnings and precautions	Less-DILI-Concern	Calcium channel blockers	90	0.271	Neutral	346.337	Class 2	-3.58526	3.125	=	71.358	>	75.598	>	173.898	>	120.157	1.4		NO EFFECT		NO EFFECT					NO	=	18.104	=	9.687	=	32.75	=	25.804	=	42.147	52.173	0.294	0	0	0	4	4
Nizatidine	3	LT00315	5	Adverse reactions	Less-DILI-Concern	Antiulcer agents	300	3.02	Neutral	331.463	Class 4	-3.04331	-0.162	>	300	>	300	>	300	>	300	1		NO EFFECT		NO EFFECT						=	300	=	300	=	300	=	300	=	300	NE at 100	0.583	0	0	0	0	0
Paroxetine	1	LT00128	8	Adverse reactions	Less-DILI-Concern	Antidepressants	60	0.06	Neutral	329.369	Class 4	-3.73953	4.238	=	35.872	=	22.634	=	32.248	=	30.902	1	=	15.7703		NO EFFECT					NO	=	8.479	=	5.533	=	9.062	=	13.017	=	21.701	NE at 100	0.368	0	0	0	4	4
Pioglitazone	2	LT00134	3	Warnings and precautions	Less-DILI-Concern	Antidiabetics	45	2.946	Neutral	356.439	Class 2	-3.89877	3.533	>	262.746	>	300	>	300	>	300	1	>	25	>	100						=	300	=	300	=	300	=	300	=	300	0.098	0.316	0	9	9	4	13
Piroxicam	2	LT01679	3	Warnings and precautions	Less-DILI-Concern	NSAIDs	20	5.131	Acid	331.351	Class 1A	-4.21926	1.888	>	277.44	>	300	>	300	>	300	1		NO EFFECT	>	100					YES	=	300	=	300	=	300	=	300	=	300	NE at 100	0.067	0	3	3	0	3
Pravastatin	3	LT00186	3	Warnings and precautions	Less-DILI-Concern	Antihyperlipidemics	80	0.21	Neutral	424.53	Class 4	-3.72482	2.048	=	112.175	>	300	>	300	>	300	1		NO EFFECT		NO EFFECT						=	300	=	300	=	300	=	300	=	300	92.681	0.739	0	0	0	4	4
Pyrazinamide	1	LT00166	3	Warnings and precautions	Less-DILI-Concern	Antimycobacterials	2000	406.944	Neutral	123.115	Class 2	-1.78928	-0.676	>	300	>	300	>	300	>	300	1		NO EFFECT		NO EFFECT						=	300	=	300	=	300	=	300	=	300	NE at 100	0	0	0	0	4	4
Ranitidine	3	LT00138	5	Adverse reactions	Less-DILI-Concern	Antiulcer agents	300	4	Base	314.408	Class 4	-3.02037	0.67	>	300	>	300	>	300	>	300	1		NO EFFECT		NO EFFECT					NO											NE at 100	0.538	0	0	0	0	0
Rosiglitazone	1	LT00140	3	Warnings and precautions	Less-DILI-Concern	Antidiabetics	8	1.2	Neutral	357.432	Class 2	-4.6501	3.02	=	259.328	>	276.073	>	300	>	294.398	1	>	22.6544	>	88.741					NO											4.809	0.278	0	6	6	0	6
Saquinavir Methanesulfonate	2	LT01746	3	Warnings and precautions	Less-DILI-Concern	Antivirals	2000	4.858	Neutral	670.841	Class 4	-2.52559	4.727	=	42.423	=	50.486	=	85.525	=	59.22	1.4		NO EFFECT	>	100						=	23.373	=	35.327	=	44.028	=	54.31	=	45.843	7.085	0.5	4	13	9	4	13
Sertraline Hydrochloride	1	LT00625	3	Adverse reactions	Less-DILI-Concern	Antidepressants	200	0.08	Neutral	306.234	Class 2	-3.18502	5.347	=	26.976	=	10.368	=	22.845	=	23.202	1	>	25	>	90.36						=	27.384	=	40.487	=	46.887	=	49.147	=	41.571	NE at 100	0.294	4	4	0	4	4
Simvastatin	2	LT00142	3	Warnings and precautions	Less-DILI-Concern	Antihyperlipidemics	80	0.024	Neutral	418.57	Class 2	-3.71868	4.481	=	1.238	=	26.433	=	86.701	=	85.912	1		NO EFFECT		NO EFFECT					YES	=	28.944	=	31.953	=	13.802	=	36.208	=	21.743	47.365	0.76	0	1	1	4	5
Tacrolimus	2	LT00448	5	Adverse reactions	Less-DILI-Concern	Immunosuppressants	60	0.039	Neutral	804.024	Class 4	-4.12712	5.776	>	88.548	>	101.156	>	139.678	>	130.155	1.1		NO EFFECT		NO EFFECT						=	165.065	=	113.276	=	88.27	=	52.055	=	70.272	16.004	0.773	0	0	0	0	0
Tamsulosin	1	LT00982	0	No match	Less-DILI-Concern	Antiadrenergics	0.8	0.039	Neutral	408.516	Class 2	-5.70812	2.167	>	300	=	164.711	>	300	>	300	1		NO EFFECT		NO EFFECT	=	2.9	=	10	NO	=	300	=	300	=	300	=	44.79	=	300	NE at 200	0.4	0	0	0	0	0
Telmisartan	2	LT02063	3	Adverse reactions	Less-DILI-Concern	A2RA	80	0.71	Neutral	514.626	Class 2	-3.8084	7.293	=	157.4			>	300	>	300	1	=	27.5		NO EFFECT																5.02	0.182	0	5	5	4	9
Tenofovir Disoproxil	3	LT02224	3	Warnings and precautions	Less-DILI-Concern	Antivirals	300	1.15	Acid	287.215	Class 3A	-2.98109	-1.564	>	300	>	300	>	300	>	300	1		NO EFFECT	=	63.22	=	34.2	=	28	NO											NE at 100	0.444	0	1	1	0	1
Tetracycline Hydrochloride	3	LT00036	2	Warnings and precautions	Less-DILI-Concern	Antibacterials	2000	20.96	Zwit	444.438	Class 3B	-2.34678	-0.896	>	178.055	>	186.717	>	195.377	>	215.797	0.9		NO EFFECT		NO EFFECT						=	300	=	165.308	=	300	=	65.434	=	56.437	NE at 100	0.409	0	3	3	0	3
Thioguanine	1	LT00452	2	Warnings and precautions	Less-DILI-Concern	Antineoplastic agents	150	0.058	Acid	167.195	Class 1A	-3.04713	0.894	>	300	=	14.465	=	50.346	=	29.263	1.7		NO EFFECT		NO EFFECT						=	300	=	300	=	300	=	300	=	300	NE at 100	0	0	0	0	0	0
Trazodone	2	LT01830	5	Adverse reactions	Less-DILI-Concern	Antidepressants	375	5.056	Base	371.87	Class 2	-2.99636	3.85	>	300	=	275.492	>	300	>	300	1		NO EFFECT		NO EFFECT					YES	=	291.862	=	300	=	300	=	12.935	=	8.727	NE at 100	0.368	4	5	1	4	5
Valsartan	4	LT01857	3	Adverse reactions	Less-DILI-Concern	A2RA	320	14.7	Neutral	435.525	Class 4	-3.13386	4.859	>	300	>	300	>	300	>	300	1		NO EFFECT		NO EFFECT					NO											NE at 100	0.375	4	4	0	4	4
Vancomycin	3	LT00161	0	No match	Less-DILI-Concern	Antibacterials	2000	0.69	Neutral	1449.27	Class 4	-2.86012	-1.142	>	300	>	300	>	300	>	300	1		NO EFFECT		NO EFFECT	>	300	=	47		=	300	=	300	=	300	=	300	=	300	NE at 100	0	0	0	0	4	4
Venlafaxine Hydrochloride	1	LT00174	7	Adverse reactions	Less-DILI-Concern	Antidepressants	225	0.6	Neutral	277.405	Class 2	-3.09093	3.269	>	283.481	>	257.04	>	300	>	290.62	1		NO EFFECT		NO EFFECT						=	300	=	300	=	300	=	300	=	300	NE at 100	0.647	4	4	0	4	4
Verapamil Hydrochloride	1	LT00332	3	Warnings and precautions	Less-DILI-Concern	Calcium channel blockers	480	0.165	Base	454.607	Class 2	-2.97639	4.466	>	223.918	=	65.114	=	164.657	=	171.552	1		NO EFFECT		NO EFFECT	=	6.7	=	61	NO	=	300	=	138.036	=	282.546	=	142.139	=	169.522	NE at 100	0.519	4	4	0	4	4
Warfarin	2	LT00647	5	Adverse reactions	Less-DILI-Concern	Antithrombotics	10	4.865	Acid	308.331	Class 1A	-4.48902	2.901	>	300	>	300	>	300	>	300	1		NO EFFECT	>	100					NO	=	300	=	300	=	300	=	300	=	300	NE at 100	0.158	0	2	2	4	6
4-Aminosalicylic Acid	1	LT00505	5	Warnings and precautions	Most-DILI-Concern	Antimycobacterials	12000	152.806	Acid	153.136	Class 1A	-1.1059	1.056	>	300	>	300	>	300	>	300	1		NO EFFECT		NO EFFECT	>	300	=	54	NO	=	300	=	300	=	300	=	300	=	300	NE at 100	0	0	0	0	0	0
Abacavir (sulfate)	1	LT00040	8	Warnings and precautions	Most-DILI-Concern	Antivirals	600	14.8	Neutral	286.337	Class 2	-2.67873	0.806	>	300	>	300	>	300	>	300	1		NO EFFECT		NO EFFECT	>	300	=	39	NO	=	300	=	300	=	300	=	300	=	300	NE at 100	0.5	0	0	0	0	0
Allopurinol	2	LT00043	8	Warnings and precautions	Most-DILI-Concern	Antigout agents	800	13.812	Neutral	136.114	Class 2	-2.23081	0.63	>	300	>	300	>	300	>	300	1		NO EFFECT		NO EFFECT					NO	=	300	=	300	=	300	=	300	=	300	NE at 100	0	0	0	0	4	4
Amineptine		LT00045	8	Withdrawn	Most-DILI-Concern	Antidepressants	200	4.6	Zwit	337.46	Class 3A	-3.22719	2.51	>	300	>	300	>	300	>	300	1		NO EFFECT		NO EFFECT	=	194	=	40	NO	=	300	=	300	=	300	=	300	=	300	NE at 100	0.409	0	0	0	4	4
Amiodarone Hydrochloride	2	LT00046	8	Box warning	Most-DILI-Concern	Antiarrhythmics	1600	0.852	Base	645.308	Class 4	-2.60565	8.945	>	41.769	>	31.597	>	94.229	>	47.956	2	>	25	>	100	>	300	=	92	NO	=	28.104	=	20.594	=	21.114	=	47.324	=	17.152	NE at 100	0.4	4	12	8	4	12
Azathioprine	1	LT00006	5	Warnings and precautions	Most-DILI-Concern	Immunosuppressants	200	3.607	Acid	277.267	Class 3A	-3.14187	0.512	>	198.18	>	27.357	>	300	>	161.067	1.9		NO EFFECT		NO EFFECT						=	300	=	158.964	=	53.038	=	77.933	=	44.016	NE at 100	0.111	0	3	3	0	3
Benoxaprofen		LT00513	8	Withdrawn	Most-DILI-Concern	NSAIDs	600	156.78	Neutral	301.729	Class 2	-2.70147	3.824	=	239.842	>	300	>	300	>	300	1		NO EFFECT		NO EFFECT	=	112.7	=	96	NO	=	300	=	300	=	300	=	300	=	300	95.11	0.125	4	11	7	4	11
Benzarone		LT01120	8	Withdrawn	Most-DILI-Concern	Vasoprotectives	300	15	Neutral	266.295	Class 2	-2.94824	4.642	=	48.291	=	50.444	>	159.766	=	89.414	1.8	>	22.0996	=	40.859	=	4	=	100	YES	=	50.818	=	43.296	=	47.275	=	5.806	=	53.013	69.745	0.118	4	16	12	4	16
Benzbromarone		LT00278	8	Withdrawn	Most-DILI-Concern	Antigout agents	100	4.339	Neutral	424.087	Class 4	-3.62745	5.978	=	88.442	=	98.595	>	225.606	>	152.103	1.5	>	15.3516	<	3.783	=	0.4	=	100	YES	=	58.71	=	39.34	=	33.75	=	19.91	=	20.3	14.94	0.118	4	16	12	4	16
Benziodarone		LT01121	8	Withdrawn	Most-DILI-Concern	Antigout agents	600	5.5	Acid	518.079	Class 3B	-2.93624	6.358	=	105.118	=	85.887	=	187.27	=	76.897	2.4	=	15.8061	<	3.125	=	2.3	=	106	NO	=	33.269			=	17.142					11.102	0.118	4	18	14	4	18
Bicalutamide	2	LT00056	8	Warnings and precautions	Most-DILI-Concern	Antineoplastic agents	50	1.97	Neutral	430.377	Class 2	-3.93488	2.707	=	99.3	=	135.101	>	300	=	110.048	2.7	=	11.0204		NO EFFECT	=	18.8	=	89	NO	=	35.445	=	23.198	=	224.162	=	31.628	=	13.976	25.784	0.222	0	8	8	4	12
Bosentan	2	LT01140	7	Box warning	Most-DILI-Concern	ETRAs	250	4.2	Acid	551.614	Class 1B	-3.3437	4.167	=	146.917	>	226.165	>	300	>	300	1	>	25		NO EFFECT	>	300	=	95	YES	=	300	=	300	=	300	=	300	=	300	50.29	0.259	4	11	7	4	11
Bromfenac		LT00519	8	Withdrawn	Most-DILI-Concern	NSAIDs	150	14.4	Neutral	334.174	Class 2	-3.34788	3.284	>	300	>	300	>	300	>	300	1		NO EFFECT		NO EFFECT	>	300	=	92	NO	=	300	=	300	=	300	=	300	=	300	NE at 100	0.067	4	4	0	4	4
Carbamazepine	2	LT00060	7	Warnings and precautions	Most-DILI-Concern	Antiepileptics	1600	43.5944	Neutral	236.273	Class 2	-2.16929	2.38	>	300	>	300	>	300	>	300	1		NO EFFECT		NO EFFECT	>	300	=	1	NO	=	300	=	300	=	300	=	300	=	300	91.341	0	0	3	3	4	7
Cinchophen		LT01219	8	Withdrawn	Most-DILI-Concern	Antigout agents	1000	361	Acid	249.268	Class 1A	-2.39667	4.281	>	300	>	300	>	300	>	300	1		NO EFFECT		NO EFFECT	>	300	=	85	NO	=	300	=	300	=	300	=	300	=	300	64.919	0	4	8	4	4	8
Ciprofloxacin	4	LT00178	7	Warnings and precautions	Most-DILI-Concern	Antibacterials	1000	11.469	Zwit	331.345	Class 3A	-2.52028	-0.725	>	277.002	>	300	>	300	>	300	1		NO EFFECT		NO EFFECT	>	300	=	9	NO	=	300	=	300	=	300	=	300	=	300	NE at 100	0.412	0	2	2	0	2
Clozapine	2	LT00287	5	Warnings and precautions	Most-DILI-Concern	Antipsychotics	900	0.95	Base	326.829	Class 2	-2.56008	3.714	=	150.685	=	61.548	=	129.314	=	133.805	1		NO EFFECT		NO EFFECT					YES	=	119.726	=	165.798	=	300	=	105.897	=	119.254	NE at 100	0.278	4	5	1	4	5
Cyclosporin	2	LT00380	7	Warnings and precautions	Most-DILI-Concern	Immunosuppressants	1800	0.44	Neutral	1202.62	Class 4	-2.82486	14.36	>	39.525	>	99.185	>	300	>	300	1	>	25		NO EFFECT						=	300	=	300	=	300	=	300	=	300	2.393	0	4	9	5	4	9
Dacarbazine	3	LT00288	6	Box warning	Most-DILI-Concern	Antineoplastic agents	315	159.18	Neutral	182.186	Class 2	-2.7622	0.477	>	300	>	275.314	>	300	>	300	1		NO EFFECT		NO EFFECT	>	300	=	17	NO	=	300	=	300	=	258.52	=	300	=	300	NE at 100	0.333	0	3	3	0	3
Diclofenac	1	LT00084	8	Warnings and precautions	Most-DILI-Concern	NSAIDs	200	7.993	Acid	296.149	Class 1A	-3.17048	4.726	=	216.328	>	300	>	300	>	300	1		NO EFFECT	>	100	=	43.2	=	74	YES	=	500	=	500	=	410.4	=	105.1	=	22.32	16.493	0.071	4	11	7	4	11
Didanosine	3	LT01285	8	Warnings and precautions	Most-DILI-Concern	Antivirals	400	3.903	Neutral	236.23	Class 2	-2.77128	-0.338	>	300	>	300	>	300	>	300	1		NO EFFECT		NO EFFECT	>	300	=	-5	NO	=	300	=	300	=	300	=	300	=	300	NE at 100	0.5	0	0	0	0	0
Ebrotidine		LT01849	8	Withdrawn	Most-DILI-Concern	Antihistamines	800	1.83	Neutral	477.431	Class 2	-2.77582	2.617	=	155.909	=	66.923	=	214.428	=	67.164	3.2	=	10.5225		NO EFFECT	=	3.8	=	94	YES											52.795	0.214	0	13	13	4	17
Erythromycin	3	LT00092	5	Warnings and precautions	Most-DILI-Concern	Antibacterials	1000	1.85	Neutral	733.93	Class 4	-2.86565	1.611	>	300	>	300	>	300	>	300	1		NO EFFECT		NO EFFECT	=	5.5				=	300	=	300	=	300	=	300	=	300	NE at 100	0.946	0	0	0	4	4
Erythromycin Estolate				Warnings and precautions	Most-DILI-Concern	Antibacterials	1000	5.3	Neutral	789.994	Class 4	-2.89762	2.99	>	188.052	=	113.522	=	129.436	=	133.475	1	=	16.46	=	63.637	>	>100	=	99	NO											4.696	0.925	0	11	11	4	15
Ethambutol	3	LT01345	8	Warnings and precautions	Most-DILI-Concern	Antimycobacterials	2500	31.8	Base	204.312	Class 4	-1.91235	0.119	>	300	>	300	>	300	>	300	1		NO EFFECT		NO EFFECT	>	300	=	53	NO	=	300	=	300	=	300	=	300	=	300	NE at 100	1	0	0	0	0	0
Etodolac	2	LT00240	8	Warnings and precautions	Most-DILI-Concern	NSAIDs	1000	69.6	Acid	287.357	Class 1A	-2.45842	3.432	>	300	>	300	>	300	>	300	1		NO EFFECT		NO EFFECT	>	300	=	97	YES	=	300	=	300	=	300	=	300	=	300	NE at 100	0.471	4	4	0	4	4
Febuxostat	2	LT00554	8	Warnings and precautions	Most-DILI-Concern	Antigout agents	80	8.2	Acid	316.379	Class 1A	-3.59712	4.097	>	252.647	>	300	>	300	>	300	1	>	25	>	82.2192			=	32.89		=	300	=	300	=	300	=	139.734	=	242.935	46.234	0.312	0	7	7	4	11
Fenoprofen		LT00099	8	Warnings and precautions	Most-DILI-Concern	NSAIDs	3200	58.2	Acid	242.273	Class 1A	-1.87916	3.821	>	300	>	300	>	300	>	300	1		NO EFFECT		NO EFFECT	>	300	=	38	NO	=	300	=	300	=	71.302	=	300	=	300	NE at 100	0.133	4	4	0	4	4
Fipexide		LT01372	8	Withdrawn	Most-DILI-Concern	Nootropic agents	600	2.96	Neutral	388.849	Class 2	-2.81163	4.473	=	134.549	=	121.467	>	241.167	=	60.796	4	>	25		NO EFFECT	=	19.2	=	79	YES	=	153.815	=	132.744	=	300	=	156.684	=	209.681	26.936	0.35	4	16	12	4	16
Fluconazole	3	LT00179	8	Warnings and precautions	Most-DILI-Concern	Antifungals	400	8.816	Neutral	306.271	Class 2	-2.88405	-0.44	>	300	>	300	>	300	>	300	1		NO EFFECT		NO EFFECT	>	300	=	10	NO	=	300	=	300	=	300	=	300	=	300	NE at 100	0.231	0	0	0	4	4
Flutamide	2	LT00101	8	Box warning	Most-DILI-Concern	Antineoplastic agents	750	0.362	Neutral	276.213	Class 2	-2.56618	3.335	=	54.045	>	128.561	=	238.388	=	73.316	3.3	=	14.4	=	42.53	=	22.9	=	98	NO	=	210.262	=	140.175	=	174.826	=	113.737	=	90.138	NE at 100	0.364	4	10	6	4	10
Gefitinib	2	LT00402	4	Warnings and precautions	Most-DILI-Concern	Antineoplastic agents	500	1.4	Base	446.908	Class 4	-2.95125	5.602	=	15.324	=	20.148	=	59.887	=	70.563	0.8		NO EFFECT		NO EFFECT																10.196	0.364	4	9	5	4	9
Griseofulvin	2	LT00558	8	Warnings and precautions	Most-DILI-Concern	Antifungals	750	4.54	Neutral	352.768	Class 2	-2.67243	2.053	=	152.305	=	240.754	>	300	>	300	1		NO EFFECT		NO EFFECT						=	300	=	300	=	300	=	300	=	300	85.726	0.412	0	4	4	4	8
Hydroxyurea	3	LT00106	8	Warnings and precautions	Most-DILI-Concern	Antineoplastic agents	2000	793.639	Neutral	76.0546	Class 4	-1.5801	-1.8	>	278.46	>	300	>	300	>	300	1		NO EFFECT		NO EFFECT	>	300	=	-4	NO	=	300	=	300	=	300	=	300	=	300	NE at 100	0	0	4	4	4	8
Imatinib	2	LT00107	8	Warnings and precautions	Most-DILI-Concern	Antineoplastic agents	800	1.66	Base	493.612	Class 2	-2.7903	4.529	>	84.496	=	24.987	=	106.976	=	60.237	1.8	>	25		NO EFFECT																12.786	0.241	4	11	7	4	11
Iproniazid		LT00109	8	Withdrawn	Most-DILI-Concern	Antidepressants	250	27.9	Neutral	179.222	Class 2	-2.85545	0.256	>	300	>	300	>	300	>	300	1		NO EFFECT		NO EFFECT	>	300	=	-4	NO	=	300			=	300					NE at 100	0.333	0	0	0	0	0
Isoniazid	1	LT00306	8	Box warning	Most-DILI-Concern	Antimycobacterials	300	76.564	Neutral	137.141	Class 2	-2.66005	-0.668	>	300	>	300	>	300	>	300	1		NO EFFECT		NO EFFECT	>	300	=	6	NO	=	300	=	300	=	300	=	300	=	300	NE at 100	0	0	0	0	4	4
Ketoconazole	2	LT00111	8	Box warning	Most-DILI-Concern	Antifungals	400	12.507	Neutral	533.453	Class 4	-3.12504	3.026	=	54.644	=	38.537	=	100.515	=	34.045	3	=	9.16047		NO EFFECT	=	4.8	=	117	NO	=	32.321	=	49.082	=	34.041	=	96.063	=	46.221	4.578	0.462	4	19	15	4	19
Labetalol	1	LT00112	8	Warnings and precautions	Most-DILI-Concern	Beta blockers	2400	2.683	Neutral	328.412	Class 2	-2.13621	2.5	>	300	=	175.178	>	300	>	300	1		NO EFFECT		NO EFFECT	=	16.4	=	19	NO	=	300	=	300	=	300	=	300	=	6.518	NE at 100	0.316	0	1	1	4	5
Lapatinib	2	LT02204	8	Box warning	Most-DILI-Concern	Antineoplastic agents	1500	4.182	Neutral	581.065	Class 4	-2.58813	5.965	=	9.975	=	11.676	=	37.915	=	47.171	0.8		NO EFFECT		NO EFFECT	=	5.5	=	78	NO	=	46.086	=	46.385	=	150	=	188.852	=	154.478	15.466	0.172	4	10	6	4	10
Leflunomide	2	LT00113	8	Box warning	Most-DILI-Concern	Immunosuppressants	100	24.796	Neutral	270.209	Class 2	-3.4317	2.324	>	112.605	=	129.953	=	228.436	=	191.29	1.2		NO EFFECT	>	100	=	14.4	=	98		=	300	=	300	=	300	=	300	=	300	NE at 100	0.167	0	6	6	4	10
Macitentan				Warnings and precautions	Most-DILI-Concern	ETRAs	10	3.13	Neutral	588.273	Class 4	-4.76958	4.3	=	162.792	>	300	>	300	>	300	1	>	25	=	38.579					NO											6.98	0.263	0	9	9	0	9
Mercaptopurine	2	LT00003	8	Warnings and precautions	Most-DILI-Concern	Antineoplastic agents	200	13.143	Neutral	152.181	Class 2	-2.88133	0.823	>	300	<	0.361	=	5.441	=	5.013	1.1		NO EFFECT		NO EFFECT	>	300	=	26	NO	=	300	=	300	=	300	=	300	=	300	NE at 100	0	0	4	4	4	8
Methimazole		LT00580	8	Warnings and precautions	Most-DILI-Concern	Antithyroid agents	60	1.866	Acid	114.171	Class 1A	-3.2794	0.82	>	300	>	300	>	300	>	300	1		NO EFFECT		NO EFFECT	>	300	=	6	NO	=	300	=	300	=	300	=	300	=	300	NE at 100	0.25	0	0	0	0	0
Methotrexate	3	LT00026	3	Box warning	Most-DILI-Concern	Antineoplastic agents	30	0.772	Acid	454.445	Class 3B	-4.18036	-0.529	>	292.755	<	0.293	<	0.293					NO EFFECT		NO EFFECT	=	3.1	=	78	NO	=	300	=	300	=	300	=	300	=	300	NE at 100	0.25	0	4	4	0	4
Mexiletine	1	LT01553	3	Box warning	Most-DILI-Concern	Antiarrhythmics	1200	3.827	Base	179.261	Class 2	-2.1743	2.569	>	300	>	300	>	300	>	300	1		NO EFFECT		NO EFFECT						=	300	=	300	=	300	=	300	=	300	NE at 100	0.455	0	0	0	4	4
Minocycline Hydrochloride	1	LT00416	8	Warnings and precautions	Most-DILI-Concern	Antibacterials	200	8.74	Zwit	457.48	Class 1B	-3.35934	0.206	=	37.407	>	300	>	300	>	300	1		NO EFFECT		NO EFFECT						=	300	=	300	=	300	=	300	=	300	NE at 100	0.435	0	3	3	0	3
Nefazodone	2	LT00124	8	Box warning	Most-DILI-Concern	Antidepressants	600	6.8	Neutral	470.007	Class 2	-2.89395	5.725	=	35.491	=	44.26	=	75.873	=	20.259	3.7	=	11.2344		NO EFFECT	=	8.4	=	97	YES	=	53.05	=	84.7	=	136.09	=	27.79	=	20.45	6.182	0.44	4	18	14	4	18
Nevirapine	2	LT00260	8	Box warning	Most-DILI-Concern	Antivirals	400	25.12	Neutral	266.303	Class 2	-2.82332	2.65	>	300	>	300	>	300	>	300	1		NO EFFECT		NO EFFECT	>	300	=	33	NO	=	300	=	300	=	300	=	300	=	300	NE at 100	0.267	0	0	0	4	4
Niacin; Nicotinic Acid	1	LT00312	7	Warnings and precautions	Most-DILI-Concern	Vitamins	2000	146.211	Neutral	123.111	Class 2	-1.78927	0.799	>	300	>	300	>	300	>	165.339	1.8		NO EFFECT		NO EFFECT	>	300	=	8	NO	=	300	=	300	=	300	=	300	=	300	NE at 100	0	0	0	0	4	4
Nimesulide	2	LT00314	8	Withdrawn	Most-DILI-Concern	NSAIDs	200	21.083	Neutral	308.313	Class 2	-3.18796	3.212	=	183.892	>	282.26	>	300	>	298.858	1		NO EFFECT	=	5.01	=	211.2	=	45	YES	=	300	=	300	=	300	=	22.73	=	31.71	NE at 100	0.077	4	11	7	4	11
Nitrofurantoin	4	LT00125	8	Warnings and precautions	Most-DILI-Concern	Antibacterials	200	4.199	Acid	238.158	Class 3A	-3.07584	-0.467	=	85.897	=	72.084	>	280.873	=	56.483	5		NO EFFECT		NO EFFECT	=	20.6	=	88	YES	=	300	=	122.868	=	8.394	=	3.331	=	2.818	NE at 100	0.125	0	6	6	0	6
Nomifensine		LT01611	8	Withdrawn	Most-DILI-Concern	Antidepressants	200	0.384	Neutral	238.332	Class 2	-3.07615	2.372	>	269.557	=	217.414	>	300	>	300	1		NO EFFECT		NO EFFECT	=	18.7	=	4	YES	=	300	=	89.817	=	300	=	300	=	300	NE at 100	0.25	0	0	0	4	4
Nortriptyline	1	LT01615	8	Warnings and precautions	Most-DILI-Concern	Antidepressants	150	0.72	Base	263.382	Class 2	-3.24449	4.315	=	45.661	=	14.621	=	28.345	=	35.678	0.8		NO EFFECT		NO EFFECT	=	7.3	=	78	NO	=	92.738	=	67.85	=	73.956	=	87.016	=	87.196	NE at 100	0.263	4	6	2	4	6
Orlistat	4	LT02216	8	Warnings and precautions	Most-DILI-Concern	Antiobesity agents	360	0.02	Neutral	495.74	Class 4	-3.13895	8.609	>	300	>	300	>	300	>	300	1		NO EFFECT		NO EFFECT	>	300	=	32	NO	=	300	=	300	=	300	=	300	=	300	NE at 100	0.897	4	4	0	4	4
Pazopanib		LT00672	8	Box warning	Most-DILI-Concern	Antineoplastic agents	800	68.569	Neutral	437.526	Class 2	-2.73791	3.654	=	53.439	=	33.491	>	281.718	>	152.797	1.8	=	4.6925	=	81.85	=	18	=	87	NO	=	300	=	154.205	=	19.227	=	94.077	=	62.218	31.225	0.19	4	20	16	4	20
Perhexiline	2	LT00131	8	Withdrawn	Most-DILI-Concern	Calcium channel blockers	300	0.404	Neutral	277.493	Class 2	-2.96613	7.153	=	15.288	=	6.96	=	11.04	=	13.457	0.8		NO EFFECT	=	5.03	=	4	=	100	NO	=	5.903	=	5.311	=	9.724	=	12.197	=	7.63	81.426	1	4	8	4	4	8
Pirprofen		LT01680	8	Withdrawn	Most-DILI-Concern	NSAIDs	1200	91.375	Acid	251	Class 1A	-2.32049	2.602	>	300	>	300	>	300	>	300	1		NO EFFECT		NO EFFECT	=	86.2	=	86.5	NO											NE at 100	0.308	0	0	0	4	4
Rifampin	2	LT00034	8	Warnings and precautions	Most-DILI-Concern	Antimycobacterials	600	12.81	Zwit	822.94	Class 3B	-3.13722	3.71	=	78.844	>	104.771	>	211.001	>	198.055	1.1		NO EFFECT	>	100	=	138.8	=	99	NO	=	300	=	300	=	300	=	300	=	300	26.447	0.535	4	13	9	4	13
Ritonavir	2	LT01737	8	Warnings and precautions	Most-DILI-Concern	Antivirals	1200	19.7	Neutral	720.955	Class 2	-2.77873	4.937	=	74.869	>	171.371	>	300	=	113.203	2.7		NO EFFECT		NO EFFECT	=	11.3	=	69	NO	=	300	=	300	=	300	=	300	=	300	2.847	0.432	4	13	9	4	13
Sitaxsentan		LT02449	8	Withdrawn	Most-DILI-Concern	ETRAs	100	28.6	Acid	454.91	Class 3B	-3.65793	3.444	>	266.149	>	272.317	>	319.375	=	400.162	0.8		NO EFFECT	>	37.182					NO											14.907	0.222	4	14	10	4	14
Sorafenib	2	LT01241	8	Warnings and precautions	Most-DILI-Concern	Antineoplastic agents	800	13.3	Neutral	464.825	Class 4	-2.7642	5.455	=	16.399	=	14.103	=	58.152	=	17.649	3.3	=	7.78	=	8.55																12.432	0.095	4	23	19	4	23
Stavudine	3	LT00144	8	Box warning	Most-DILI-Concern	Antivirals	80	3.463	Neutral	224.215	Class 4	-3.44757	-0.488	>	300	>	300	>	300	>	300	1		NO EFFECT		NO EFFECT	>	300	=	6	NO	=	300	=	300	=	300	=	300	=	300	NE at 100	0.4	0	0	0	0	0
Sulfamethoxazole	2			Warnings and precautions	Most-DILI-Concern	Antibacterials	2000	236.9	Acid	253.281	Class 1A	-2.10257	0.563	>	300	>	300	>	300	>	300	1		NO EFFECT		NO EFFECT	>	300	=	17	NO	=	300	=	300	=	300	=	300	=	300	NE at 100	0.1	0	0	0	0	0
Sulindac	2	LT00148	8	Warnings and precautions	Most-DILI-Concern	NSAIDs	400	31.986	Acid	356.43	Class 1A	-2.94991	3.157	>	300	>	300	>	300	>	300	1		NO EFFECT		NO EFFECT	>	300	=	5	YES	=	300	=	45	=	28.46	=	6.762	=	6.477	NE at 100	0.15	4	4	0	4	4
Sunitinib Malate	1	LT00565	8	Box warning	Most-DILI-Concern	Antineoplastic agents	50	0.08	Base	398.479	Class 4	-3.90144	2.998	=	17.229	=	4.141	=	19.102	=	23.586	0.8		NO EFFECT		NO EFFECT					NO											28.981	0.364	0	1	1	0	1
Tacrine	1			Withdrawn	Most-DILI-Concern	Anticholinesterase	120	0.08	Neutral	198.268	Class 2	-3.21807	3.274	>	217.685	>	99.032	>	226.295	>	206.674	1.1		NO EFFECT		NO EFFECT	=	22.4	=	35	NO											NE at 200	0.308	4	4	0	4	4
Tamoxifen	1	LT00152	8	Warnings and precautions	Most-DILI-Concern	Antineoplastic agents	40	0.106455	Base	371.521	Class 4	-3.96792	6.818	=	31.555	>	26.445	>	44.443	>	40.115	1.1	>	23.8603	>	60.233	=	8	=	76	NO	=	31.739	=	20.283	=	27.513	=	25.454	=	25.347	NE at 100	0.231	0	0	0	0	0
Tasosartan		LT00687	8	Discontinued	Most-DILI-Concern	Angiotensin II Receptor Antagonists	100	3.88321	Neutral	411.469	Class 4	-3.61434	2.455	>	109.378	>	275.978	>	300	>	300	1	>	25		NO EFFECT	=	9	=	89	NO	=	300	=	300	=	300	=	5.769	=	22.153	17.223	0.217	0	8	8	4	12
Telithromycin	2	LT01944	8	Warnings and precautions	Most-DILI-Concern	Antibacterials	800	2.5	Neutral	812.012	Class 4	-3.00647	3.746	=	236.384	=	169.185	=	278.898	=	269.82	1		NO EFFECT		NO EFFECT																35.513	0.721	4	8	4	4	8
Ticrynafen		LT00636	8	Withdrawn	Most-DILI-Concern	Diuretics	500	33.2	Acid	331.174	Class 1A	-2.82109	3.233	>	245.754	>	300	>	300	>	300	1		NO EFFECT		NO EFFECT	=	187.4	=	82	YES	=	300	=	300	=	300	=	300	=	300	NE at 100	0.077	4	7	3	4	7
Tipranavir	2	LT01220	8	Box warning	Most-DILI-Concern	Antivirals	1000	95	Neutral	602.671	Class 4	-2.78008	7.764	=	101.035	=	20.443	=	74.222	=	47.647	1.6		NO EFFECT	>	100	=	15.6	=	94	YES	=	8.539	=	12.41	=	7.603	=	12.839	=	9.595	4.188	0.355	4	15	11	4	15
Tolcapone	2	LT00156	8	Box warning	Most-DILI-Concern	Dopaminergics	600	20.875	Neutral	273.243	Class 2	-2.6584	3.245	=	93.469	=	88.207	=	249.844	=	138.155	1.8	>	25	>	14.56	=	58.5	=	97	NO	=	300	=	300	=	300	=	300	=	300	50.691	0.071	4	17	13	4	17
Troglitazone		LT00168	8	Withdrawn	Most-DILI-Concern	PPARs	600	6.387	Neutral	441.54	Class 4	-2.86682	5.585	=	78.64	>	241.618	>	238.672	>	199.826	1.2	=	12.8732	=	22.511	=	2.7	=	96	YES	=	29.397	=	47.198	=	40.526	=	15.184	=	8.527	8.472	0.417	4	16	12	4	16
Trovafloxacin Mesylate		LT00645	8	Withdrawn	Most-DILI-Concern	Antibacterials	200	5.02	Neutral	416.358	Class 2	-3.31844	-0.178	=	26.225	>	44.48	>	300	>	300	1		NO EFFECT		NO EFFECT	=	162.9	=	70	NO	=	300	=	300	=	300	=	264.7	=	300	NE at 100	0.25	0	3	3	4	7
Valproic Acid	1	LT00160	8	Box warning	Most-DILI-Concern	Antiepileptics	4500	153.941	Acid	144.212	Class 1A	-1.50579	2.76	>	300	>	294.074	>	300	>	300	1	>	25		NO EFFECT	>	300	=	3	NO	=	300	=	300	=	300	=	300	=	300	NE at 100	0.875	0	7	7	4	11
Zafirlukast	2	LT01869	8	Warnings and precautions	Most-DILI-Concern	LTD4 antagonists	40	1.211	Neutral	575.675	Class 4	-4.15812	7.092	=	99.354	=	146.541	>	187.711	=	151.882	1.2	=	10.9746	>	100	=	46.1	=	98	NO	=	70.157	=	47.697	=	34.115	=	33.862	=	25.228	3.584	0.29	0	8	8	0	8
Zalcitabine	3			Warnings and precautions	Most-DILI-Concern	Antivirals	2.25	0.059	Neutral	211.22	Class 4	-4.97255	-1.247	>	300	>	300	>	300	>	300	1		NO EFFECT		NO EFFECT	>	300	=	12	NO	=	300	=	300	=	300	=	300	=	300	NE at 100	0.556	0	0	0	0	0
Zidovudine	1	LT00163	8	Box warning	Most-DILI-Concern	Antivirals	600	6.137	Neutral	267.244	Class 4	-2.64876	0.044	>	300	>	300	>	300	>	300	1		NO EFFECT		NO EFFECT	>	300	=	29	NO	=	300	=	300	=	300	=	300	=	300	NE at 100	0.6	0	0	0	0	0
Zimelidine		LT01874	8	Withdrawn	Most-DILI-Concern	Antidepressants	200	0.64	Neutral	317.228	Class 2	-3.20034	3.194	>	300	=	92.544	>	300	=	148.934	2		NO EFFECT		NO EFFECT	=	1.2	=	31	NO	=	300	=	226.252	=	210.812	=	129.241	=	80.201	NE at 100	0.188	4	6	2	4	6
Albuterol; Salbutamol	3	LT01051	0	No match	No-DILI-Concern	Adrenergics	12	0.058	Base	239.313	Class 4	-4.29979	0.061	>	300	>	300	>	300	>	300	1		NO EFFECT		NO EFFECT	>	300	=	9	NO											NE at 200	0.538	0	0	0	0	0
Amikacin	3	LT01068	0	No match	No-DILI-Concern	Antibacterials	1	64.9	Neutral	585.608		-5.76761	-6.298	>	300	>	300	>	300	>	300	1	>	25		NO EFFECT	>	300	=	-23	NO											NE at 100	0.955	0	4	4	0	4
Atropine	3	LT00511	0	No match	No-DILI-Concern	Anticholinergics	3	0.025	Neutral	289.373	Class 4	-4.98434	1.299	>	300	>	300	>	300	>	300	1		NO EFFECT		NO EFFECT	>	300	=	-3	NO	>	300	>	300	>	300	=	6.691	>	300	NE at 200	0.588	0	0	0	0	0
Benztropine Mesylate		LT01123	0	No match	No-DILI-Concern	Anticholinergics	2	0.45	Base	307.434	Class 2	-5.18672	3.52	=	14.055	=	6.562	=	11.872	=	16.69	0.7		NO EFFECT	=	48.3	=	44.3	=	89	NO	=	126.304	=	106.962	=	200.931	=	162.802	=	89.119	NE at 200	0.429	0	2	2	0	2
Betaine		LT02189	0	No match	No-DILI-Concern	Amino Acid Supplements	6000	70.1772	Acid	118.155	Class 3A	-1.2943	-4.173	>	300	>	300	>	300	>	240.876	1.2		NO EFFECT		NO EFFECT	>	300	=	4	NO	=	300	=	300	=	300	=	300	=	300	NE at 100	0.8	0	0	0	0	0
Biperiden	1	LT00817	0	No match	No-DILI-Concern	Antimuscarinics	16	0.32	Neutral	311.469	Class 2	-4.28929	4.942	>	300	=	69.681	=	200.603	=	174.447	1.1		NO EFFECT		NO EFFECT	=	30.1	=	92	NO	=	279.4	=	299.9	=	300	=	193.1	=	83.79	82.192	0.619	0	0	0	0	0
Brompheniramine Maleate		LT02076	0	No match	No-DILI-Concern	Antihistamines	24	0.0363363	Base	319.244	Class 2	-4.12391	3.298	>	300	=	106.189	>	196.632	>	210.629	0.9		NO EFFECT		NO EFFECT	=	2	=	20	NO	=	300	=	300	=	300	=	6.984	=	150.251	NE at 200	0.312	0	0	0	0	0
Carbetapentane Citrate				No match	No-DILI-Concern	Antitussives	50	0.35	Neutral	333.469	Class 2	-3.82409	4.703	=	118.657	=	54.481	>	213.551	=	130.521	1.6		NO EFFECT	=	44.4	=	6	=	66												NE at 200	0.65	0	0	0	4	4
Chlorpheniramine	1	LT00009	0	No match	No-DILI-Concern	Antihistamines	24	0.520397	Base	274.793	Class 2	-4.05879	3.148	>	289.646	=	235.482	>	300	>	300	1		NO EFFECT		NO EFFECT	=	14.9	=	14	NO	=	300	=	300	=	300	=	8.941	=	300	NE at 200	0.312	0	0	0	0	0
Clemastine	1	LT02222	0	No match	No-DILI-Concern	Antihistamines	9	0.004	Base	343.895	Class 2	-4.58218	5.447	=	47.401	=	22.204	=	44.103	=	46.302	1		NO EFFECT	=	32.87	=	2.4	=	100	NO	=	39.135	=	28.958	=	65.857	=	32.844	=	25.792	NE at 100	0.429	0	0	0	0	0
Cyanocobalamin (Vitamin B12)	1	LT02002	0	No match	No-DILI-Concern	Vitamins	5	0.00055938	Neutral	1355.38		-5.43309	-7.696	=	89.665	=	65.351	=	83.85	=	83.44	1		NO EFFECT		NO EFFECT	>	300	=	1		=	300	=	300	=	300	=	300	=	300	NE at 100	0	0	0	0	0	0
Digoxin	3	LT00292	0	No match	No-DILI-Concern	Antiarrythmatic	0.5	0.003	Neutral	780.943	Class 4	-6.19365	1.423	<	0.301	<	0.358	<	0.293	<	0.293	1		NO EFFECT		NO EFFECT	>	300	=	10	NO	>	300	>	300	>	300	>	300	>	300	NE at 100	0.927	0	0	0	0	0
Dihydroergotamine		LT02218	0	No match	No-DILI-Concern	Vasoconstrictors	4	0.017	Base	583.685	Class 4	-5.16412	4.765	=	137.82	=	58.855	=	92.723	=	80.213	1.2		NO EFFECT	>	100	=	18	=	83	YES	=	110.7	=	62.43	=	118.7	=	130.3	=	89.6	36.778	0.485	0	0	0	0	0
Diphenhydramine	1	LT00087	0	No match	No-DILI-Concern	Antihistamines	300	0.343	Base	255.359	Class 2	-2.93003	3.452	>	300	=	186.217	>	300	>	300	1		NO EFFECT		NO EFFECT	=	58.5	=	37	NO	>	300	>	300	>	300	>	300	=	121.5	NE at 100	0.294	4	4	0	4	4
Dobutamine Hydrochloride	1	LT01308	0	No match	No-DILI-Concern	Adrenergics	500	1.337	Base	301.384	Class 4	-2.78015	2.433	=	186.936	=	126.935	>	300	>	300	1		NO EFFECT		NO EFFECT	=	52	=	7	YES	=	300	=	300	=	2.775	=	3.363	=	0.293	30.889	0.333	0	3	3	4	7
Doxylamine Succinate		LT00727	0	No match	No-DILI-Concern	Antihistamines	40	0.37	Base	270.374	Class 2	-3.8299	2.354	>	300	>	300	>	300	>	300	1		NO EFFECT		NO EFFECT	=	8	=	6	NO											NE at 200	0.353	0	0	0	0	0
Esmolol	1	LT01333	0	No match	No-DILI-Concern	Beta blockers	2500	6.8	Neutral	295.376	Class 2	-2.07244	1.716	>	300	>	300	>	300	>	300	1		NO EFFECT		NO EFFECT	=	13	=	9	NO	=	300	=	300	=	300	=	300	=	300	NE at 100	0.562	0	0	0	4	4
Fexofenadine	3	LT01370	0	No match	No-DILI-Concern	Antihistamines	180	0.98	Neutral	501.663	Class 4	-3.44514	1.957	>	300	>	300	>	300	>	300	1		NO EFFECT		NO EFFECT	>	300	=	51	NO											NE at 200	0.406	0	0	0	4	4
Fludrocortisone Acetate	1	LT00399	0	No match	No-DILI-Concern	Antiinflammation	0.2	0.0037	Neutral	380.453	Class 2	-6.27927	1.73	>	300	>	300	>	300	>	300	1		NO EFFECT		NO EFFECT	=	126.2	=	46	NO											119.4	0.81	0	0	0	0	0
Folic Acid	2	LT01580	0	No match	No-DILI-Concern	Vitamins	1	0.135122	Neutral	441.402	Class 4	-5.64483	-2.31	>	300	>	300	>	300	>	300	1		NO EFFECT		NO EFFECT	>	300	=	75	NO	=	300	=	192.307	=	300	=	300	=	300	NE at 100	0.211	0	0	0	0	0
Guanethidine		LT00829	0	No match	No-DILI-Concern	Antihypertensives	50	0.05	Base	198.312	Class 4	-3.59838	1.354	>	271.771	=	40.363	=	90.62	=	131.83	0.7		NO EFFECT		NO EFFECT	=	26	=	19	NO	=	300	=	300	=	300	=	300	=	300	NE at 200	0.9	0	0	0	0	0
Hydroxyzine	1	LT01437	0	No match	No-DILI-Concern	Antihistamines	400	0.19	Neutral	374.909	Class 2	-2.97187	3.995	=	67.241	=	18.072	=	50.696	=	44.311	1.1		NO EFFECT	>	100	=	46.7	=	66	NO	=	261.633	=	247.374	=	300	=	274.005	=	63.526	NE at 200	0.429	4	5	1	4	5
Isoproterenol		LT00200	0	No match	No-DILI-Concern	Adrenergics	90	2.4	Base	211.259	Class 4	-3.37057	0.153	>	291.059	=	157.371	>	300	>	290.979	1		NO EFFECT		NO EFFECT	=	267.1	=	19	YES	=	300	=	300	=	25.323	=	2.996	=	2.209	NE at 100	0.455	0	1	1	0	1
Kanamycin A	3	LT01477	0	No match	No-DILI-Concern	Antibacterials	1000	72.2394	Base	484.499	Class 4	-2.68529	-5.173	>	300	>	300	>	300	>	300	1		NO EFFECT		NO EFFECT	>	300	=	3	NO	=	300	=	300	=	300	=	300	=	300	NE at 100	1	0	0	0	0	0
Liothyronine		LT00783	0	No match	No-DILI-Concern	Thyroid agents	0.075	0.108	Zwit	650.963	Class 3B	-6.9385	2.631	>	253.975	>	300	>	300	>	300	1		NO EFFECT		NO EFFECT	=	21.4	=	102	NO	=	300	=	300	=	300	=	300	=	300	49.363	0.133	0	0	0	0	0
Loratadine	2	LT01498	0	No match	No-DILI-Concern	Antihistamines	40	0.068	Neutral	382.889	Class 2	-3.98101	5.051	=	38.73	=	67.049	=	160.374	=	125.812	1.3	>	25		NO EFFECT	=	3	=	84	NO											28.671	0.364	0	0	0	4	4
Metaproterenol Sulfate			0	No match	No-DILI-Concern	Adrenergics	90	0.062	Base	211.259	Class 4	-3.37057	0.083	>	300	>	300	>	300	>	300	1		NO EFFECT		NO EFFECT	>	300	=	0	NO	=	300	=	300	=	300	=	300	=	300	NE at 100	0.455	0	0	0	0	0
Methysergide Maleate		LT02072	0	No match	No-DILI-Concern	Vasoconstrictors	8	0.004	Neutral	353.463	Class 2	-4.64525	2.224	>	300	=	285.087	>	300	>	300	1		NO EFFECT		NO EFFECT	=	36.7	=	63	NO	=	76.302	=	43.153	=	78.079	=	20.814	=	14.939	128	0.476	0	0	0	0	0
Minoxidil	1	LT00587	0	No match	No-DILI-Concern	Antihypertensives	100	0.96	Neutral	209.252	Class 4	-3.32067	-0.724	>	300	>	300	>	300	>	300	1		NO EFFECT		NO EFFECT	>	300	=	25		=	300	=	300	=	300	=	300	=	300	NE at 100	0.556	0	0	0	0	0
Oxybutynin Hydrochloride	1	LT02084	0	No match	No-DILI-Concern	Antispasmodics	30	0.022	Base	357.491	Class 4	-4.07614	4.867	=	103.001	=	53.895	=	214.639	=	85.692	2.5		NO EFFECT	=	74.73	=	8.7	=	92	YES	=	40.416	=	46.169	=	77.563	=	131.308	=	10.677	28.656	0.591	0	2	2	0	2
Paliperidone	4	LT01252	0	No match	No-DILI-Concern	Antipsychotics	12	0.025	Neutral	426.492	Class 2	-4.55073	1.074	>	300	>	300	>	300	>	300	1		NO EFFECT		NO EFFECT	=	43.3	=	7	NO											73.045	0.522	0	0	0	0	0
Pamabrom		LT02055	0	No match	No-DILI-Concern	Diuretics	200	14.9	Acid	259.062	Class 1A	-3.11237	0.929	>	300	>	300	>	300	>	300	1		NO EFFECT		NO EFFECT	>	300	=	56	NO											NE at 200	0.286	0	0	0	0	0
Paromomycin		LT02061	0	No match	No-DILI-Concern	Antibacterials	4000	38.0098	Base	615.629		-2.18726	-6.523	>	300	>	300	>	300	>	300	1		NO EFFECT		NO EFFECT	>	300	=	-4	NO	=	300	=	300	=	300	=	300	=	300	NE at 100	1	0	0	0	0	0
Penbutolol Sulfate		LT01644	0	No match	No-DILI-Concern	Beta blockers	80	0.962199	Base	291.432	Class 4	-3.56145	3.639	=	166.414	=	42.54	=	94.713	=	105.649	0.9		NO EFFECT		NO EFFECT	=	12.4	=	73	NO	=	53.563	=	54.639	=	59.91	=	66.788	=	37.584	NE at 100	0.667	0	2	2	0	2
Phenazopyridine Hydrochloride	4			No match	No-DILI-Concern	Anesthetic	600	0.124273	Base	213.243	Class 2	-2.55072	2.051	=	87.309	=	130.18	>	300	=	201.668	1.5	=	13.675		NO EFFECT	=	36.8	=	82	NO	=	300	=	300	=	300	=	17.597	=	69.618	77.145	0	0	0	0	4	4
Phenoxybenzamine Hydrochloride		LT02082	0	No match	No-DILI-Concern	Vasodilators	120	0.197	Neutral	303.831	Class 2	-3.40345	4.917	>	71.069	=	40.467	>	122.423	=	51.319	2.4		NO EFFECT	>	100	=	17.3	=	91	YES	=	22.712	=	12.75	=	14.019	=	8.6	=	9.55	NE at 100	0.333	4	6	2	4	6
Phentolamine		LT00433	0	No match	No-DILI-Concern	Vasodilators	10	0.086	Neutral	281.357	Class 4	-4.44926	3.809	>	300	=	133.036	>	300	>	300	1		NO EFFECT		NO EFFECT	=	15.2	=	6	YES	=	300	=	300	=	300	=	300	=	300	NE at 100	0.235	0	0	0	0	0
Primaquine	1	LT00613	0	No match	No-DILI-Concern	Antiprotozoals	15	1.08	Base	259.351	Class 2	-4.2378	2.598	>	275.203	>	136.973	=	186.228	=	210.193	0.9		NO EFFECT		NO EFFECT	=	19.6	=	8	NO	=	137.8	=	80.76	=	14.59	=	4.848	=	6.543	NE at 100	0.4	0	0	0	0	0
Primidone	2	LT00261	0	No match	No-DILI-Concern	Antiepileptics	1250	4.674	Neutral	218.255	Class 2	-2.24205	0.882	>	300	>	300	>	300	>	300	1		NO EFFECT		NO EFFECT	=	279.5	=	4	NO	=	300	=	300	=	300	=	300	=	300	48.691	0.333	0	2	2	0	2
Procyclidine Hydrochloride		LT02219	0	No match	No-DILI-Concern	Anticholinergics	25	2	Neutral	287.447	Class 2	-4.06062	4.592	>	300	=	84.27	=	289.322	=	275.54	1.1		NO EFFECT		NO EFFECT	=	23.4	=	88	NO	=	300	=	300	=	300	=	300	=	300	NE at 200	0.684	0	2	2	4	6
Protriptyline Hydrochloride	1	LT00848	0	No match	No-DILI-Concern	Antidepressants	60	0.778	Base	263.382	Class 2	-3.64243	4.865	=	83.775	=	22.207	=	39.277	=	42.692	0.9		NO EFFECT	=	81.3	=	6.9	=	76	NO											NE at 200	0.263	0	2	2	0	2
Streptomycin	3	LT00145	0	No match	No-DILI-Concern	Antibacterials	1000	42.987	Neutral	581.576	Class 4	-2.76461	-4.263	>	300	>	300	>	300	>	300	1		NO EFFECT		NO EFFECT	>	300	=	3	NO	=	300	=	300	=	300	=	300	=	300	NE at 100	0.857	0	0	0	0	0
Terazosin	1	LT01787	0	No match	No-DILI-Concern	Antiadrenergics	20	0.13	Base	387.438	Class 2	-4.28717	2.182	=	295.848	=	237.645	>	300	>	300	1		NO EFFECT		NO EFFECT	>	300	=	60	NO											NE at 200	0.526	0	0	0	0	0
Tolterodine L-Tartrate	1	LT01011	0	No match	No-DILI-Concern	Antimuscarinics	8	0.04	Neutral	325.493	Class 2	-4.60945	5.24	>	141.008	=	99.354	=	108.382	=	119.613	0.9		NO EFFECT	=	74.8	=	6.6	=	56	YES											NE at 200	0.455	0	0	0	0	0
Trihexyphenidyl	1	LT01839	0	No match	No-DILI-Concern	Antiparkinson	15	0.9	Base	301.471	Class 2	-4.30315	5.151	>	300	>	300	>	300	>	300	1		NO EFFECT		NO EFFECT	>	300	=	66	NO											NE at 200	0.7	0	0	0	0	0
Triprolidine Hydrochloride		LT00798	0	No match	No-DILI-Concern	Antihistamines	10	0.022	Base	278.397	Class 2	-4.44466	3.634	>	300	>	300	>	300	>	300	1		NO EFFECT	>	100	=	52.9	=	69	NO											NE at 200	0.316	0	0	0	0	0
Vitamin D2 (Ergocalciferol)	2	LT00194	0	No match	No-DILI-Concern	Vitamins	12.5	0.05	Neutral	396.63	Class 4	-4.50148	9.391	>	135.304	>	254.434	>	283.447	>	283.88	1		NO EFFECT		NO EFFECT																NE at 200	0.714	0	0	0	0	0
